# Supplementary material for: Molecular Mechanisms through Which Short-Term Cold Storage Improves the Nutritional Quality and Sensory Characteristics of Postharvest Sweet Potato Tuberous Roots: A Transcriptomic Study
Source: MDPI journal article supplement (doi:10.3390/foods10092079), 2021-09-02
Supplement: s1 [file s1]

**Table S1.** Primers for Quantitative Real-time PCR

| Gene             | Forward primer (5'-3') | Reverse primer (5'-3') |
|------------------|------------------------|------------------------|
| <i>α-Tubulin</i> | CAACTACCAGCCACCAACTGT  | CAAGATCCTCACGAGCTTCAC  |
| itf11g07860      | GGTGCGCCAATGGATCTCTA   | CCAGCAATGAGGCAACAAGG   |
| itf03g13310      | TTCTGGTTGTCGCCGATGAA   | GATGATCTCGTCTGGTCGGC   |
| itf09g14800      | CTTCGCGCAATTCTCTGAGC   | GCTCTGGACGTGATTGGTGA   |
| itf11g10280      | GACGATGGCGAATCCTCTGT   | AGTCGGTGCAGATCACCTTG   |
| itf11g08270      | CAGATTCTTGCCAGCCTCGT   | CTTCGAGTGTCTTTGCACGC   |
| itf09g04020      | ACACTTTGTTGTGAGCGTGC   | ACGATCACCAGGCAATAGCA   |
| itf10g08090      | TCCATCGGTGCCTCCTTCTA   | GCGCTTGAGGCGTTGAATAG   |
| itf07g12100      | CCATCGCTCCATCTTCGAGT   | GTTAGCAGCGTTGAAGCCAC   |

**Table S2.** Sample sequencing data evaluation statistics table

| Samples | Read Number | Base Number   | GC Content | %≥Q30 |
|---------|-------------|---------------|------------|-------|
| C0-1    | 31,991,228  | 9,513,061,176 | 47.09      | 94.31 |
| C0-2    | 26,415,067  | 7,864,228,308 | 47.14      | 94.04 |
| C0-3    | 23,197,468  | 6,905,479,554 | 47.11      | 94.18 |
| C14-1   | 25,520,266  | 7,608,729,444 | 47.06      | 94.22 |
| C14-2   | 25,863,789  | 7,694,022,216 | 47.21      | 94.40 |
| C14-3   | 21,576,710  | 6,437,240,780 | 46.59      | 94.05 |
| CS14-1  | 27,230,923  | 8,104,053,402 | 46.22      | 94.42 |
| CS14-2  | 30,446,586  | 9,058,842,306 | 46.28      | 94.20 |
| CS14-3  | 27,230,923  | 8,104,053,402 | 46.22      | 94.42 |

**Table S3.** Statistical table of comparison results between the second-generation sequencing data and the reference genome

| Sample | Total Reads | Mapped reads | Uniquely mapped reads | Multiple mapped reads |
|--------|-------------|--------------|-----------------------|-----------------------|
| C0-1   | 63,982,456  | 78.15%       | 75.00%                | 3.16%                 |
| C0-2   | 52,830,134  | 77.64%       | 74.64%                | 3.00%                 |
| C0-3   | 46,394,936  | 78.40%       | 75.98%                | 2.42%                 |
| C14-1  | 51,040,532  | 80.06%       | 77.39%                | 2.67%                 |
| C14-2  | 51,727,578  | 79.26%       | 75.83%                | 3.43%                 |
| C14-3  | 43,153,420  | 79.97%       | 77.40%                | 2.57%                 |
| CS14-1 | 54,461,846  | 82.57%       | 79.49%                | 3.08%                 |
| CS14-2 | 60,893,172  | 82.53%       | 79.31%                | 3.23%                 |
| CS14-3 | 55,639,714  | 82.17%       | 78.77%                | 3.40%                 |

**Table S4.** Annotation statistics table of single gene sequence

| Bionformation<br>database | Annotated<br>unigene number | 300<=length<br><1000 | length>=1000 | Percentage<br>(%) |
|---------------------------|-----------------------------|----------------------|--------------|-------------------|
| COG                       | 11147                       | 3646                 | 7373         | 35.78             |
| GO                        | 16472                       | 6480                 | 9521         | 52.88             |
| KEGG                      | 10975                       | 4518                 | 6131         | 35.23             |
| KOG                       | 17362                       | 6364                 | 10630        | 55.73             |
| Pfam                      | 26908                       | 10515                | 15802        | 86.38             |
| Swissprot                 | 22909                       | 8812                 | 13564        | 73.54             |
| eggNOG                    | 29640                       | 12125                | 16681        | 95.15             |
| NR                        | 31000                       | 12968                | 17091        | 99.52             |
| All_Annotated             | 31151                       | 13078                | 17108        | 100               |

**Table S5.** Statistics of the number of annotations for differentially expressed genes

| DEG set    | Total | COG   | eggNOG | NR    | Pfam  | Swiss-Prot | GO    | KEGG  |
|------------|-------|-------|--------|-------|-------|------------|-------|-------|
| C0 vs C14  | 1,068 | 427   | 976    | 1,016 | 928   | 811        | 632   | 380   |
| C0 vs CS14 | 9,936 | 3,981 | 9,261  | 9,509 | 8,370 | 7,106      | 5,551 | 3,697 |

**Table S6.** Comparison table of GO function annotations of differentially expressed genes

| Go term               | Go classify                   | C0 vs C14 | C0 vs CS14 | Ratio of DEGs |
|-----------------------|-------------------------------|-----------|------------|---------------|
| cellular<br>component | cell                          | 200       | 2436       | 12.18         |
|                       | membrane                      | 169       | 1352       | 8.00          |
|                       | macromolecular complex        | 42        | 668        | 15.90         |
|                       | organelle                     | 149       | 1826       | 12.26         |
|                       | organelle part                | 75        | 872        | 11.63         |
|                       | membrane part                 | 86        | 687        | 7.99          |
|                       | cell part                     | 201       | 2448       | 12.18         |
| molecular<br>function | catalytic activity            | 376       | 2982       | 7.93          |
|                       | binding                       | 301       | 2597       | 8.63          |
| biological<br>process | metabolic process             | 449       | 3764       | 8.38          |
|                       | cellular process              | 324       | 3105       | 9.58          |
|                       | single-organism process       | 338       | 2694       | 7.97          |
|                       | response to stimulus          | 138       | 1153       | 8.36          |
|                       | localization                  | 111       | 883        | 7.95          |
|                       | biological regulation         | 111       | 1017       | 9.16          |
|                       | cellular component            |           |            |               |
|                       | organization or<br>biogenesis | 55        | 580        | 10.55         |

**Table S7.** Function annotation comparison table of differentially expressed gene KEGG

| KEGG function annotation                    | Number  | C0 vs C14 | C0 vs CS14 | Differences |
|---------------------------------------------|---------|-----------|------------|-------------|
| Plant hormone signal transduction           | ko04075 | 18        | 100        | 82          |
| Protein processing in endoplasmic reticulum | ko04141 | 4         | 108        | 104         |
| Ubiquitin mediated proteolysis              | ko04120 | 4         | 55         | 51          |
| Ribosome                                    | ko03010 | 3         | 225        | 222         |
| Phenylpropanoid biosynthesis                | ko00940 | 27        | 82         | 55          |
| Amino sugar and nucleotide sugar metabolism | ko00520 | 7         | 69         | 62          |
| Glycolysis / Gluconeogenesis                | ko00010 | 10        | 76         | 66          |
| Starch and sucrose metabolism               | ko00500 | 11        | 107        | 96          |
| Biosynthesis of amino acids                 | ko01230 | 16        | 111        | 95          |
| Carbon metabolism                           | ko01200 | 11        | 131        | 120         |
| Glutathione metabolism                      | ko00480 | 6         | 63         | 57          |
| Purine metabolism                           | ko00230 | 6         | 82         | 76          |
| Pyrimidine metabolism                       | ko00240 | 11        | 70         | 59          |
| Plant-pathogen interaction                  | ko04626 | 13        | 84         | 71          |
| Endocytosis                                 | ko04144 | 0         | 58         | 58          |
| Proteasome                                  | ko03050 | 0         | 54         | 54          |
| Spliceosome                                 | ko03040 | 0         | 67         | 67          |
| RNA transport                               | ko03013 | 0         | 68         | 68          |
| Oxidative phosphorylation                   | ko00190 | 0         | 50         | 50          |
