# Supplementary figures and images for: Molecular Mechanisms through Which Short-Term Cold Storage Improves the Nutritional Quality and Sensory Characteristics of Postharvest Sweet Potato Tuberous Roots: A Transcriptomic Study
Source: MDPI journal article supplement (doi:10.3390/foods10092079), 2021-09-02

A

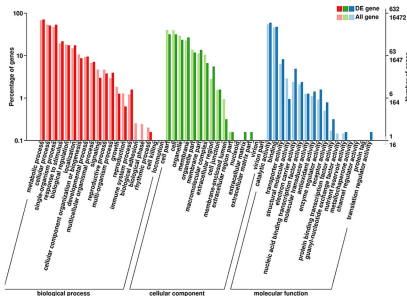

B

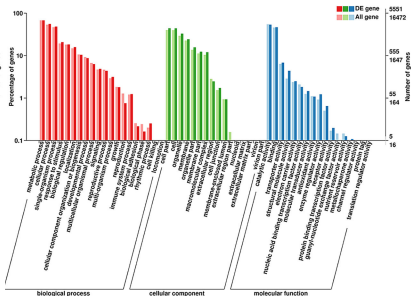

Supplement: s1 [file s1]

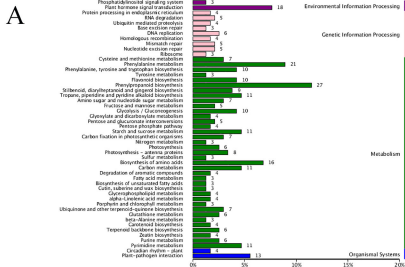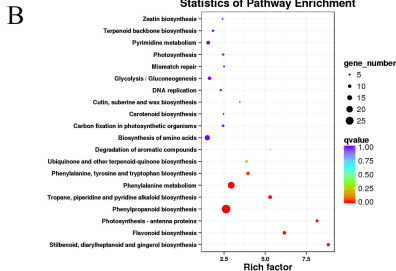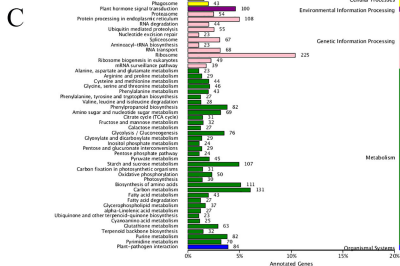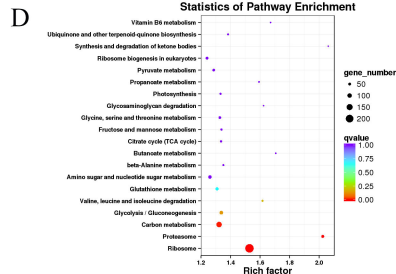

Supplement: s1 [file s1]
